# Supplementary material for: Quantifying the dependence of drop spectrum width on cloud drop number concentration for cloud remote sensing
Source: Copernicus journal article supplement (doi:10.5194/egusphere-2023-1176), 2023-06-14
Supplement: Supplementary file 1 [file egusphere-2023-1176-supplement.pdf]

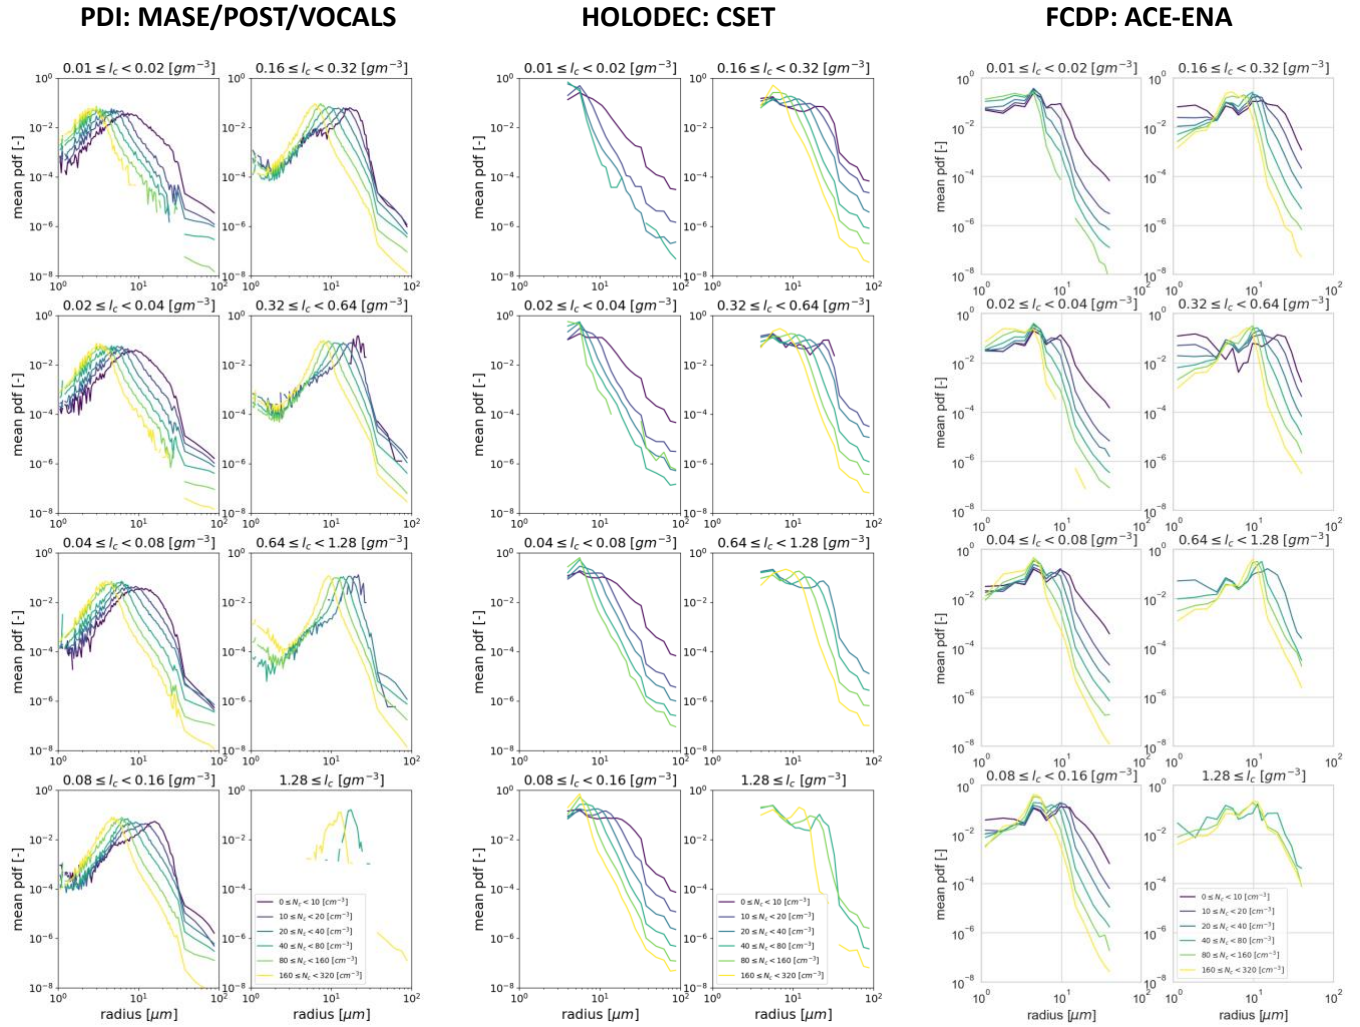

**Figure S1: The mean probability density function (pdf) of the drop concentration sorted by the cloud mode (radius < 27.5  $\mu\text{m}$ ) drop number concentration and liquid water content.**
